# Supplementary material for: Increase of tyrosinase activity at the wound site in zebrafish imaged by a new fluorescent probe
Source: Royal Society of Chemistry journal article supplement (doi:10.1039/d0cc08134e), 2021-01-01
Supplement: d0cc08134e1.pdf [file d0cc08134e1.pdf]

## Electronic Supplementary Information

### **Increase of tyrosinase activity at wound in zebrafish imaged by a new fluorescent probe**

Ziyin Chai,<sup>ab</sup> Jizhen Shang,<sup>a</sup> Wen Shi<sup>\*ab</sup>, Xiaohua Li<sup>a</sup> and Huimin Ma<sup>ab</sup>

*<sup>a</sup> Beijing National Laboratory for Molecular Sciences, Key Laboratory of Analytical Chemistry for Living Biosystems, Institute of Chemistry, Chinese Academy of Sciences, Beijing 100190, China.*

*<sup>b</sup> University of Chinese Academy of Sciences, Beijing 100049, China.*

*E-mail: shiwen@iccas.ac.cn*

## Contents

1. Apparatus and reagents
2. Synthesis of probe CF-TYR
3. Supplementary methods
4. Supplementary figures
5. References

## 1. Apparatus and reagents

$^1\text{H-NMR}$  and  $^{13}\text{C-NMR}$  spectra were measured with a Bruker DMX-400 spectrometer in  $\text{DMSO-d}_6$ . Electrospray ionization mass spectra (ESI-MS) were implemented with a Shimadzu LC-MS 2010A instrument (Kyoto, Japan). High-resolution electrospray ionization mass spectra (HR-ESI-MS) were measured on an APEX IVFTMS instrument (Bruker, Daltonics). UV-vis absorption spectra were made by a TU-1900 spectrophotometer (Beijing, China). Fluorescence spectra were recorded on an F-4600 spectrophotometer (Hitachi, Japan). MTT analyses were made on a SpectraMax I3 microplate reader (Molecular Devices, USA). Confocal fluorescence images were recorded on an FV 1200-IX83 confocal laser scanning microscope (Olympus, Japan).

3-Hydroxy-3-methyl-2-butanone, malononitrile, magnesium ethoxide, 4-acetamido-benzaldehyde, 3-hydroxybenzyl alcohol, pyridine, triphosgene and triethylamine were obtained from Beijing Innochem Science & Technology Co., Ltd. Tyrosinase, biotinidase (BTD), quinone oxidoreductase (NQO1), nitroreductase (NTR), kojic acid and 3-(4,5-dimethyl-2-thiazolyl)-2,5-diphenyl tetrazolium bromide (MTT) were purchased from Sigma-Aldrich.  $\text{KCl}$ ,  $\text{CaCl}_2$ ,  $\text{CuCl}_2$ ,  $\text{ZnCl}_2$ ,  $\text{MgCl}_2$  and tert-Butyl hydroperoxide (TBHP) were obtained from Beijing Chemicals, Ltd. Dulbecco's modified Eagle's media (DMEM), B16 and HeLa cell lines were purchased from KeyGEN BioTECH Co., Ltd. Zebrafish and tricaine methanesulfonate were provided by Nanjing EzeRinka Biotechnology Co., Ltd. Reactive oxygen species (ROS) including  $\cdot\text{OH}$ ,  $\text{H}_2\text{O}_2$ , TBHP,  $^1\text{O}_2$ ,  $\text{ClO}^-$ ,  $\text{TBO}\cdot$ ,  $\text{ONOO}^-$ , and  $\cdot\text{O}_2^-$  were prepared following the reported methods.<sup>1</sup> Ultrapure water (over  $18\text{ M}\Omega\cdot\text{cm}$ ) produced by a Milli-Q reference system (Millipore) was used throughout the experiments.

## 2. Synthesis of probe CF-TYR

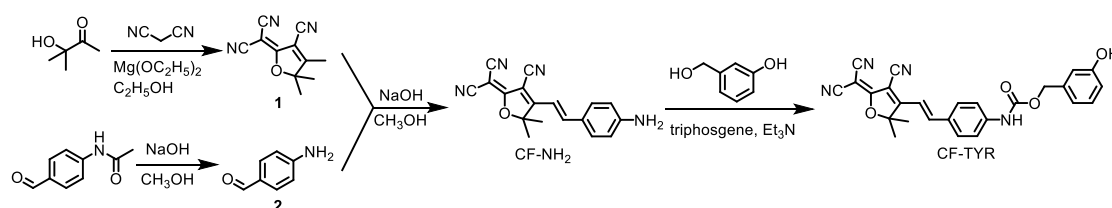

**Scheme S1** Synthesis of probe CF-TYR

The synthetic route of CF-TYR is shown in Scheme S1. Compound **1** and CF-NH<sub>2</sub> were synthesized following the reported procedure.<sup>2</sup> Compound **2** was prepared

according to the previous method.<sup>3</sup>

**Synthesis of CF-TYR.** CF-NH<sub>2</sub> (150 mg, 0.5 mmol), and triphosgene (222 mg, 0.75 mmol) were dissolved in dry dichloromethane (15 mL), followed by the addition of Et<sub>3</sub>N (200  $\mu$ L, 1.5 mmol) dropwise. The mixture was stirred at 0 °C under Ar atmosphere for 0.5 h. The resulting solution was stirred at room temperature for another 2 h, accompanied by the solution changing from purplish red to light yellow. Then 3-hydroxybenzyl alcohol (124 mg, 1.0 mmol) was added to the mixture with several drops of pyridine. The reaction mixture was stirred at room temperature for 4 h. After removal of the solvent, the residue was extracted with dichloromethane and washed with brine water for 3 times. The product was purified by silica gel column chromatography (CH<sub>2</sub>Cl<sub>2</sub>/CH<sub>3</sub>OH=100/1, v/v) to give CF-TYR as orange powder (90 mg, 40% yield). <sup>1</sup>H-NMR (400 MHz, 298 K, DMSO-d<sub>6</sub>; Fig. S1):  $\delta$  10.27 (s, 1H), 9.49 (s, 1H), 7.89 (t, J=18.0 Hz, 3H), 7.62 (d, J=8.4 Hz, 2H), 7.18 (t, J=15.2 Hz, 1H), 7.09 (d, J=16.4 Hz, 1H), 6.83 (d, J=8.0 Hz, 2H), 6.73 (d, J=7.6 Hz, 1H), 5.10 (s, 2H), 1.79 (s, 6H). <sup>13</sup>C-NMR (100 MHz, 298 K, DMSO-d<sub>6</sub>; Fig. S2):  $\delta$  177.7, 176.0, 157.9, 153.6, 147.9, 143.8, 138.1, 131.5, 130.0, 129.0, 119.0, 118.6, 115.5, 115.3, 113.7, 113.3, 112.5, 111.5, 99.7, 98.3, 66.5, 54.2, 25.7. HR-ESI-MS: m/z calcd for CF-TYR (C<sub>26</sub>H<sub>19</sub>N<sub>4</sub>O<sub>4</sub><sup>-</sup>, [M-H]<sup>-</sup>), 451.1412; found, 451.1412.

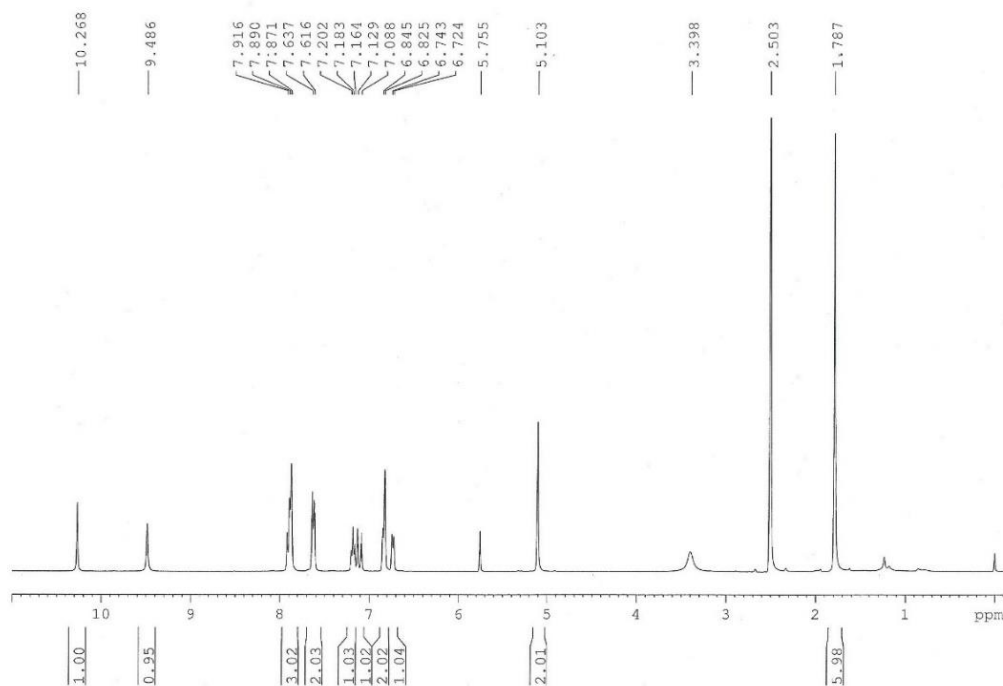

**Fig. S1** <sup>1</sup>H-NMR spectrum of CF-TYR (400 MHz, 298K, DMSO-d<sub>6</sub>).

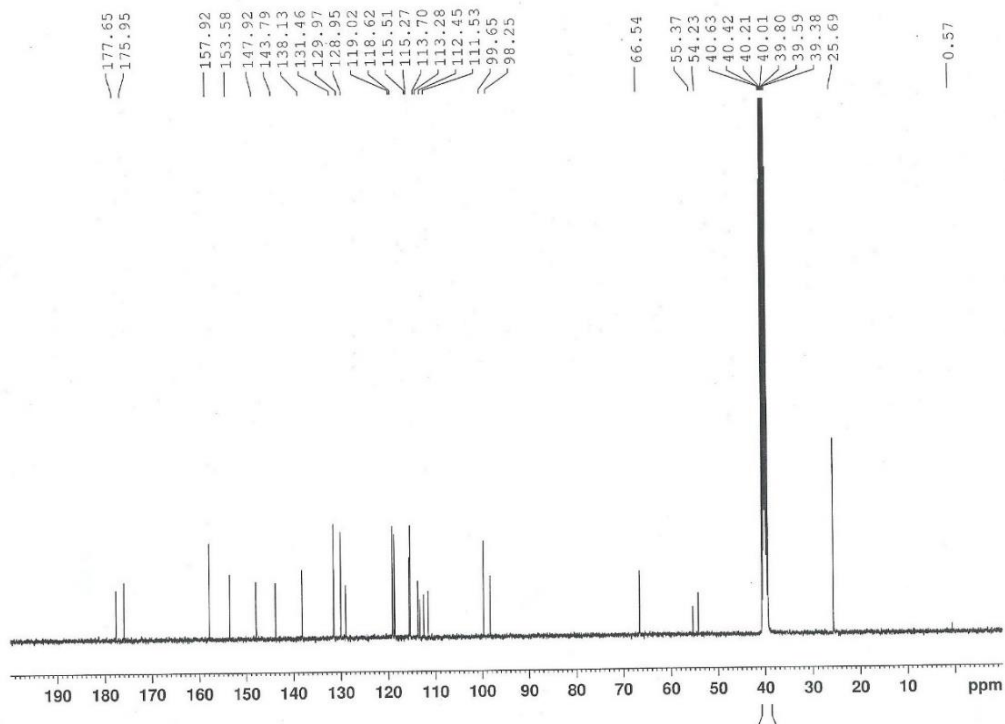

Fig. S2  $^{13}\text{C}$ -NMR spectrum of CF-TYR (100 MHz, 298K, DMSO- $d_6$ ).

Acquisition Parameter  
 Acquisition Mode Single MS  
 Polarity Negative  
 Broadband Low Mass 57.7 m/z

Acquired Scans 8  
 Broadband High Mass 800.0 m/z

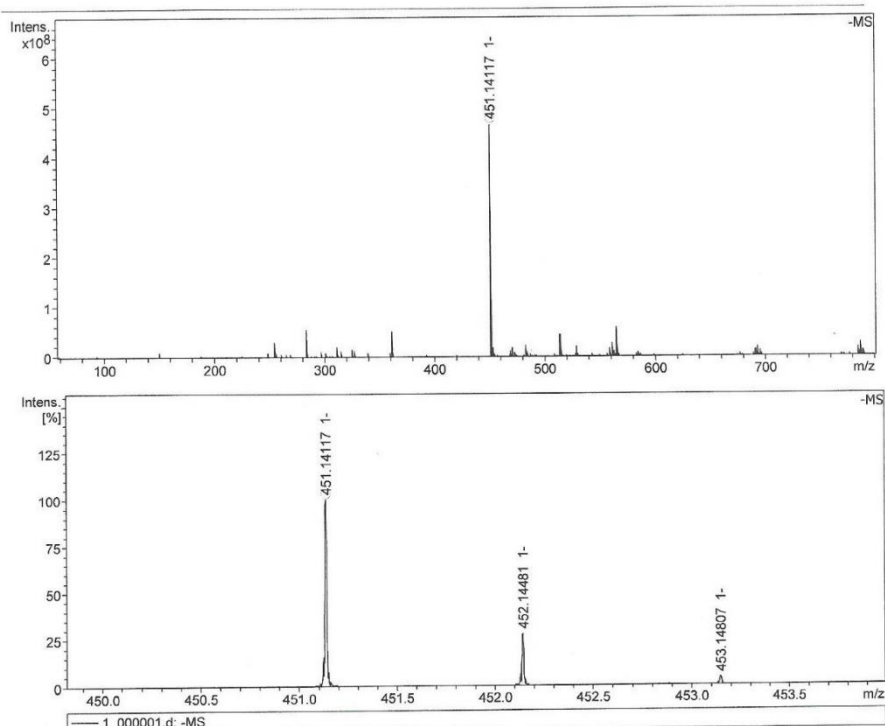

| Meas. m/z  | # | Ion Formula                                                   | Score  | m/z        | err [ppm] | Mean err [ppm] | mSigma | rdb  | e <sup>-</sup> Conf | N-Rule |
|------------|---|---------------------------------------------------------------|--------|------------|-----------|----------------|--------|------|---------------------|--------|
| 451.141165 | 1 | C <sub>26</sub> H <sub>19</sub> N <sub>4</sub> O <sub>4</sub> | 100.00 | 451.141179 | 0.0       | -0.3           | 12.2   | 19.5 | even                | ok     |

Fig. S3 HR-ESI-MS spectrum of CF-TYR.

### **3. Supplementary methods**

#### **General procedure for fluorescence assay**

Unless otherwise noted, the fluorescence of CF-TYR (10  $\mu$ M) reacting with tyrosinase was measured in phosphate buffer saline (PBS, pH 7.4). In a test tube, 0.8 mL of PBS and 10  $\mu$ L of 1 mM stock solution of CF-TYR in DMSO were mixed, followed by addition of tyrosinase solution. The final volume was adjusted to 1 mL with PBS. After reaction at 37  $^{\circ}$ C for 3 h in a shaker incubator, the reaction solution was transferred to a 1 cm quartz cell to measure fluorescence with  $\lambda_{\text{ex/em}} = 560/612$  nm. Meanwhile, a solution without tyrosinase was made and determined for comparison under the same conditions. Data are expressed as mean  $\pm$  standard deviation (n = 3).

#### **Cytotoxicity**

The cytotoxicity of CF-TYR on B16 cells and HeLa cells were evaluated by the MTT assay, as described previously.<sup>1</sup>

#### **Cell culture and fluorescence imaging in cells**

B16 cells and HeLa cells were cultured in DMEM containing 10% (v/v) fetal bovine serum and 1% (v/v) penicillin-streptomycin at 37  $^{\circ}$ C in a humidified 5% CO<sub>2</sub> incubator. For fluorescence imaging, the cells were incubated with 5  $\mu$ M CF-TYR in DMEM at 37  $^{\circ}$ C. After incubated with probe, cells were washed twice with DMEM to remove the free probe.

#### **Fluorescence imaging in zebrafish**

Zebrafish grew in E3 embryo media (15 mM NaCl, 0.5 mM KCl, 1 mM MgSO<sub>4</sub>, 1 mM CaCl<sub>2</sub>, 0.15 mM KH<sub>2</sub>PO<sub>4</sub>, 0.05 mM Na<sub>2</sub>HPO<sub>4</sub>, and 0.7 mM NaHCO<sub>3</sub>; without methylene blue). For fluorescence imaging, 3-day-old zebrafish were incubated with CF-TYR for 3 h, and then subjected to fluorescence imaging after washing with PBS. Tail-cutting zebrafish were prepared by using a blade under anesthetization with tricaine methanesulfonate.

Fluorescence imaging was conducted with an excitation wavelength of 559 nm. The fluorescence was collected in the range of 600-700 nm. Imaging processing and analysis was performed on Olympus software (FV10-ASW). Data are expressed as mean  $\pm$  standard deviation.

#### 4. Supplementary figures

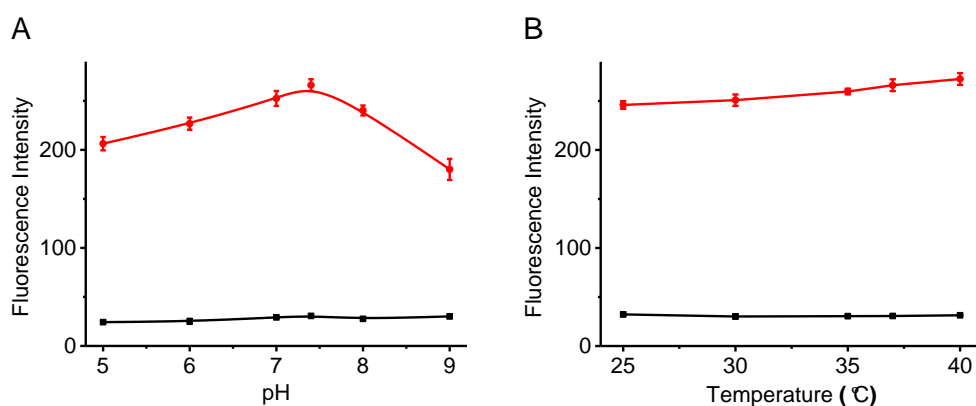

**Fig. S4** Effects of (A) pH and (B) temperature on the fluorescence intensity of CF-TYR (10  $\mu\text{M}$ ) with (red) and without (black) tyrosinase (100 U/mL).  $\lambda_{\text{ex/em}} = 560/612$  nm.

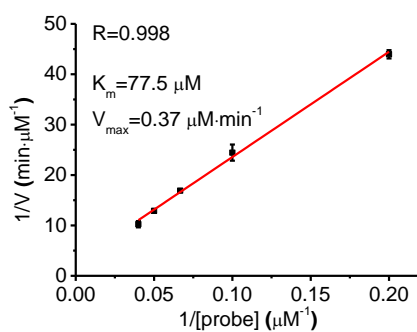

**Fig. S5** Lineweaver-Burk plot for the enzyme-catalyzed reaction. The Michaelis-Menten equation was described as:  $V = V_{\text{max}} [\text{probe}]/(K_m + [\text{probe}])$ , where  $V$  is the reaction rate,  $[\text{probe}]$  is the probe concentration, and  $K_m$  is the Michaelis constant. Conditions: 50 U/mL tyrosinase, 5-25  $\mu\text{M}$  of CF-TYR.  $\lambda_{\text{ex/em}} = 560/612$  nm.

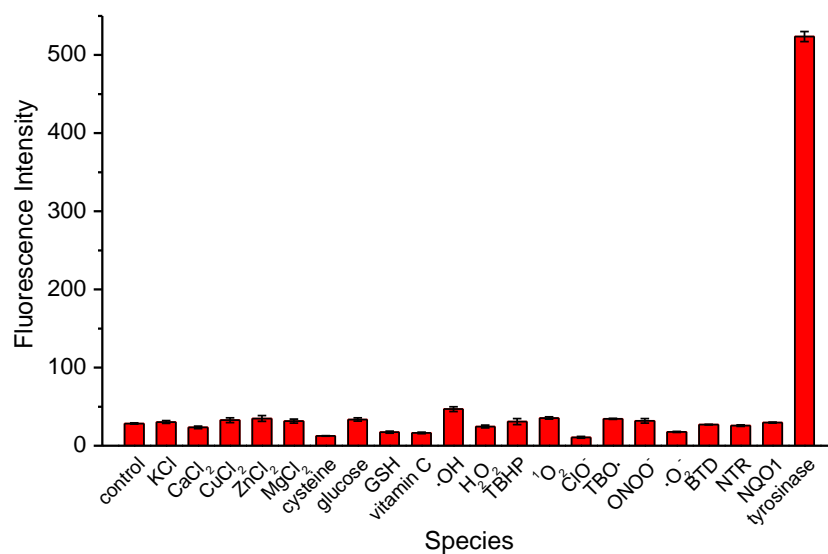

**Fig. S6** Fluorescence responses of CF-TYR (10  $\mu\text{M}$ ) to various species: (1) control; (2)

KCl (150 mM); (3) CaCl<sub>2</sub> (1 mM); (4) CuCl<sub>2</sub> (10 μM); (5) ZnCl<sub>2</sub> (100 μM); (6) MgCl<sub>2</sub> (1 mM); (7) cysteine (1 mM); (8) glucose (10 mM); (9) GSH (1 mM); (10) vitamin C (1 mM); (11) ·OH (100 μM); (12) H<sub>2</sub>O<sub>2</sub> (100 μM); (13) TBHP (100 μM); (14) <sup>1</sup>O<sub>2</sub> (100 μM); (15) ClO<sup>-</sup> (100 μM); (16) TBO· (100 μM); (17) ONOO<sup>-</sup> (100 μM); (18) ·O<sub>2</sub><sup>-</sup> (100 μM); (19) BTD (0.5 μg/mL); (20) NTR (5 μg/mL); (21) NQO1 (0.5 μg/mL); (22) tyrosinase (200 U/mL). The results are expressed as the mean ± standard deviation of three separate measurements. λ<sub>ex/em</sub> = 560/612 nm.

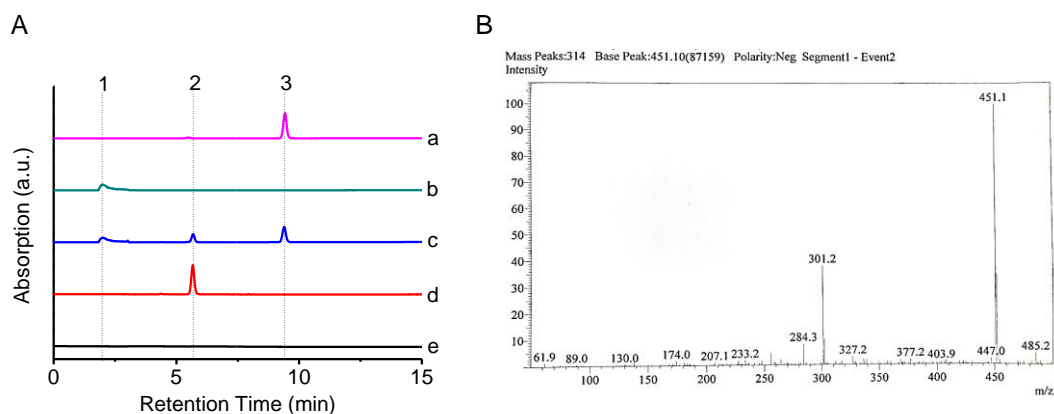

**Fig. S7** (A) Chromatograms of different reaction systems: a) CF-TYR (50 μM); b) tyrosinase (500 U/mL); c) reaction solution (50 μM CF-TYR + 500 U/mL tyrosinase); d) CF-NH<sub>2</sub> (50 μM). The assignments of the peaks: (1) t<sub>R</sub> = 2.0 min, tyrosinase; (2) t<sub>R</sub> = 5.6 min, CF-NH<sub>2</sub>; (3) t<sub>R</sub> = 9.4 min, CF-TYR. HPLC analyses were made using two LC-20AT pumps, SPD-M20A diode array detector (Shimadzu, Japan) and Inertsil ODS-SP column (5 μm, 4.6 mm×250 mm, GL Sciences Inc.) with methanol and water as eluents [elution program: 0-20 min, 70% to 100% methanol (flow rate, 1.0 mL/min)]. The chromatography peaks were monitored by the absorbance at 510 nm. (B) ESI mass spectrum of the reaction solution of CF-TYR (10 μM) with tyrosinase (200 U/mL). The peak at m/z =301.2 [M-H]<sup>-</sup> indicates the generation of fluorophore CF-NH<sub>2</sub>.

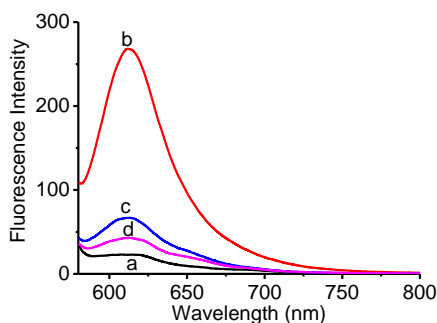

**Fig. S8** The effects of inhibitor, kojic acid, on the fluorescence spectra of the reaction



systems. (a) CF-TYR (10  $\mu\text{M}$ ); (b) CF-TYR (10  $\mu\text{M}$ ) + tyrosinase (100 U/mL); (c) system (b) + kojic acid (100  $\mu\text{M}$ ); (d) system (b) + kojic acid (200  $\mu\text{M}$ ).  $\lambda_{\text{ex/em}} = 560/612$  nm.

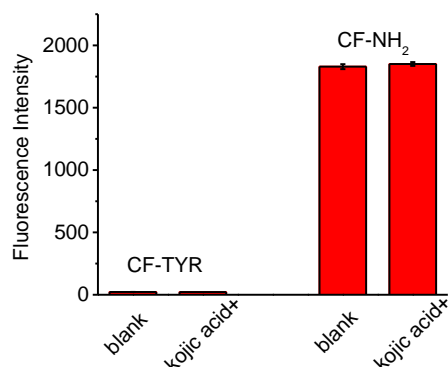

**Fig. S9** The effects of kojic acid on the fluorescence of CF-TYR (left) and CF-NH<sub>2</sub> (right). CF-TYR: 10  $\mu\text{M}$ ; CF-NH<sub>2</sub>:10  $\mu\text{M}$ ; kojic acid: 200  $\mu\text{M}$ .  $\lambda_{\text{ex/em}} = 560/612$  nm.

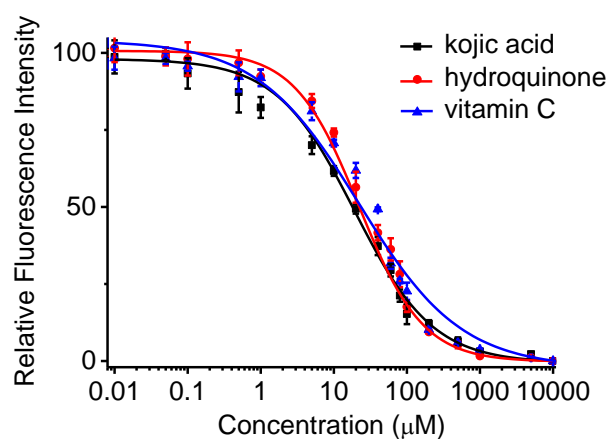

**Fig. S10** The inhibition curves of kojic acid, hydroquinone and vitamin C. Testing system: CF-TYR: 10  $\mu\text{M}$ ; tyrosinase: 200 U/mL.  $\lambda_{\text{ex/em}} = 560/612$  nm.

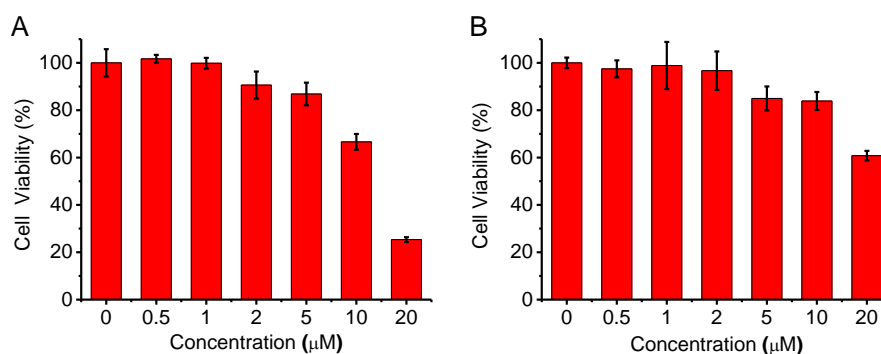

**Fig. S11** Effects of CF-TYR on the viability of (A) B16 cells and (B) HeLa cells. The viability of cells without CF-TYR is defined as 100%. The results are expressed as the mean  $\pm$  standard deviation of five separate measurements at each probe concentration.

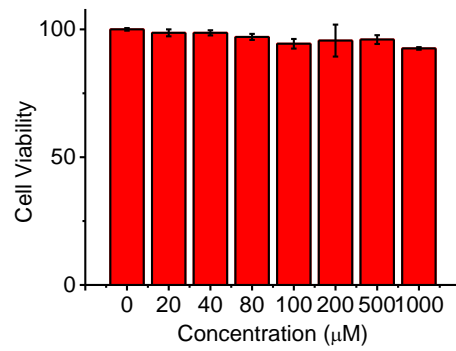

**Fig. S12** Effects of kojic acid on the viability of B16 cells. The viability of cells without kojic acid is defined as 100%. The results are expressed as the mean  $\pm$  standard deviation of five separate measurements.

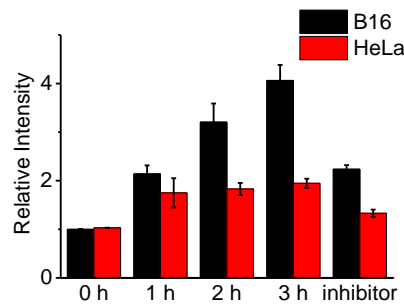

**Fig. S13** Relative fluorescence intensity of cells in Fig. 2. The intensity at least from ten cells in the fluorescence image was measured and averaged.

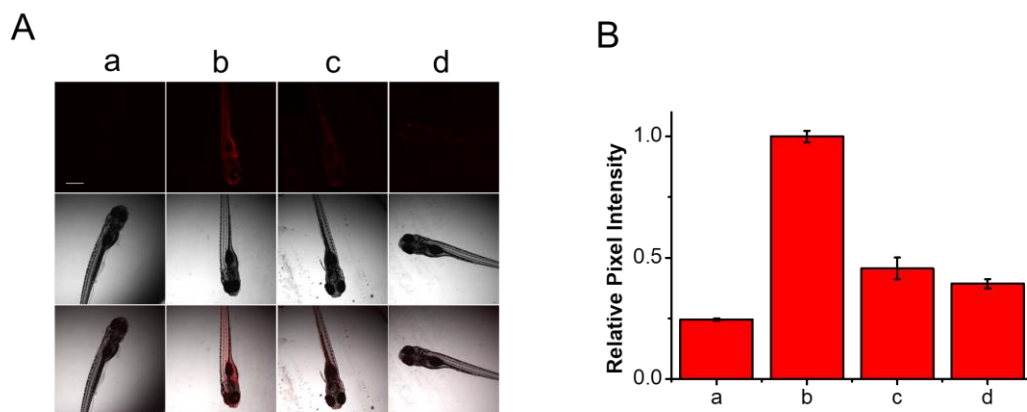

**Fig. S14** (A) Representative fluorescence images of zebrafish: (a) zebrafish only; (b) zebrafish incubated with CF-TYR for 3 h; zebrafish pretreated with (c) 200  $\mu$ M and (d) 500  $\mu$ M kojic acid for 2h, and then incubated with CF-TYR for 3 h. Scale bar, 500  $\mu$ m. (B) Relative fluorescence intensity of zebrafish (n = 5 fishes in each group) in panel (A).

## 5. References

1. (a) X. Y. Zhu, M. Y. Xiong, H. W. Liu, G. J. Mao, L. Y. Zhou, J. Zhang, X. X. Hu, X. B. Zhang and W. H. Tan, *Chem. Commun.*, 2016, **52**, 733-736; (b) R. M. Uppu, *Anal. Biochem.*, 2006, **354**, 165-168; (c) J. Zhou, L. H. Li, W. Shi, X. H. Gao, X. H. Li and H. M. Ma, *Chem. Sci.*, 2015, **6**, 4884-4888.
2. P. Gopalan, H. E. Katz, D. J. McGee, C. Erben, T. Zielinski, D. Bousquet, D. Muller, J. Grazul, and Y. Olsson, *J. Am. Chem. Soc.*, 2004, **126**, 1741-1747.
3. I. C. Pintre, J. L. Serrano, M. B. Ros, J. M. Perdiguero, I. Alonso, J. Ortega, C. L. Folcia, J. Etxebarria, R. Alicante and B. Villacampa, *J. Mater. Chem.*, 2010, **20**, 2965-2971.
